# Supplementary material for: Hydrothermal synthesis and competitive growth of flake-like M-type strontium hexaferrite
Source: Royal Society of Chemistry journal article supplement (doi:10.1039/c9ra06246g), 2019-01-01
Supplement: c9ra06246g1.pdf [file c9ra06246g1.pdf]

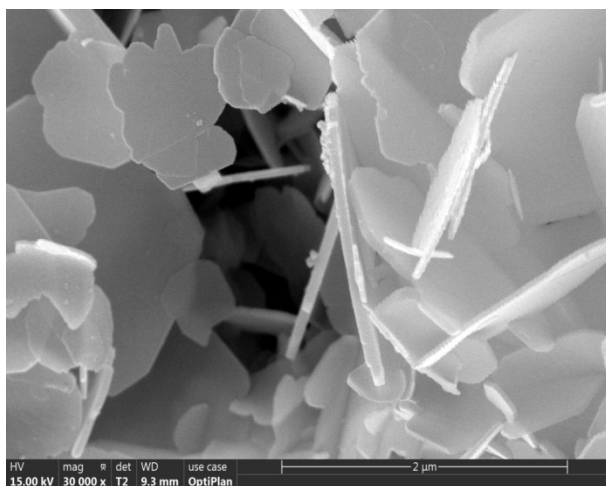

FESEM micrograph of specimens with  $R_{F/S}=2$  of ferric ions to strontium ions

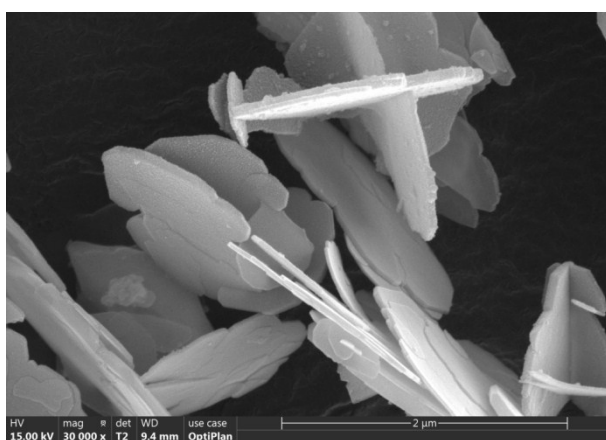

FESEM micrograph of specimens with  $R_{F/S}=3$  of ferric ions to strontium ions

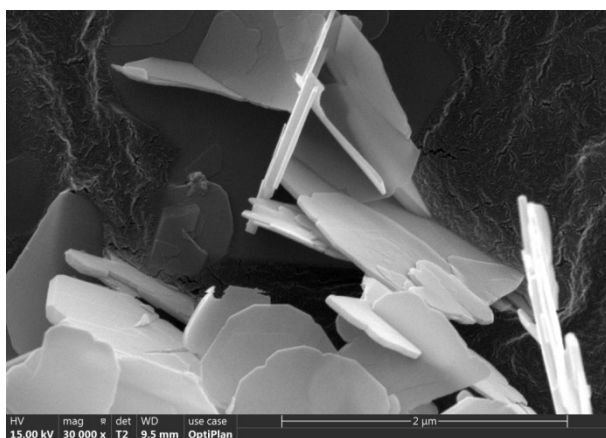

FESEM micrograph of specimens with  $R_{F/S}=4$  of ferric ions to strontium ions

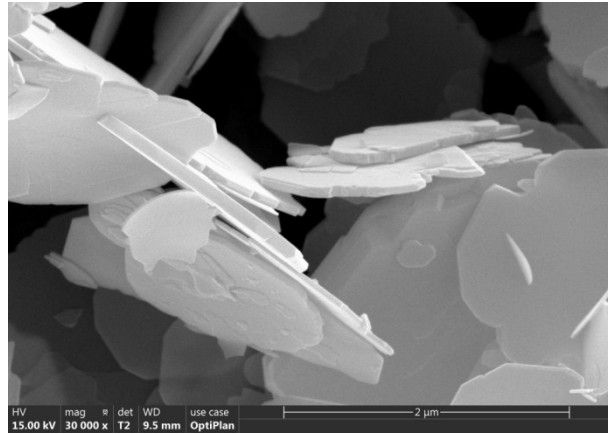

FESEM micrograph of specimens with  $R_{F/S}=8$  of ferric ions to strontium ions
